# Supplementary figures and images for: Oxoanion and cation effects on the structural morphology of coordination polymers incorporating a kinked organodiimine tethering ligand
Source: Royal Society of Chemistry journal article supplement (doi:10.1039/b701102d), 2007-01-01

Figure S1. TGA trace for **1**.

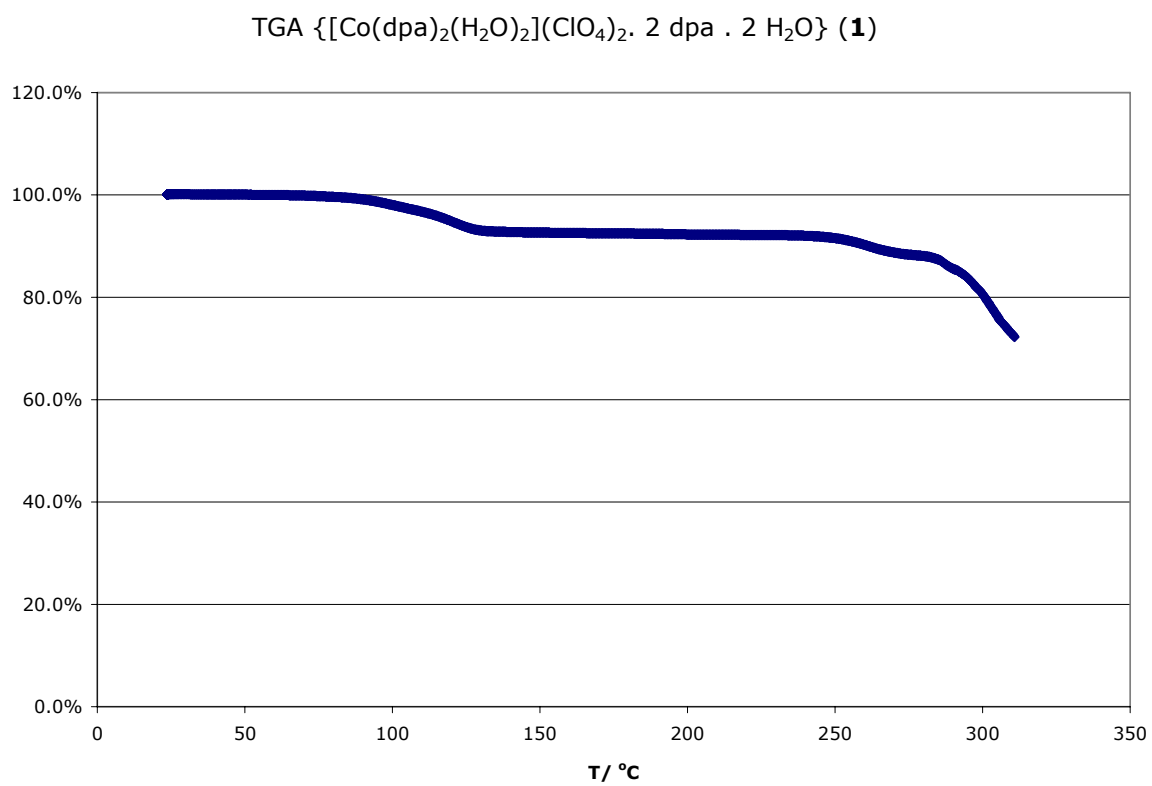

Figure S2. TGA trace for **2**.

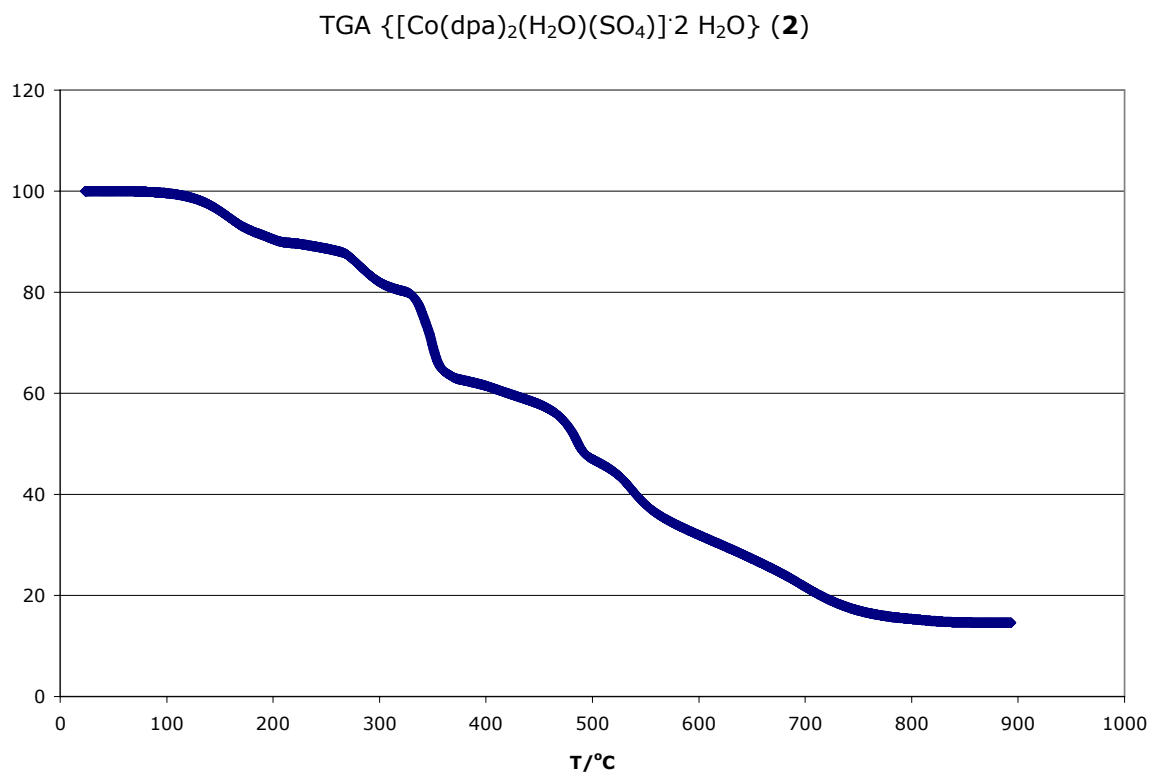

Figure S3. TGA trace for **3**.

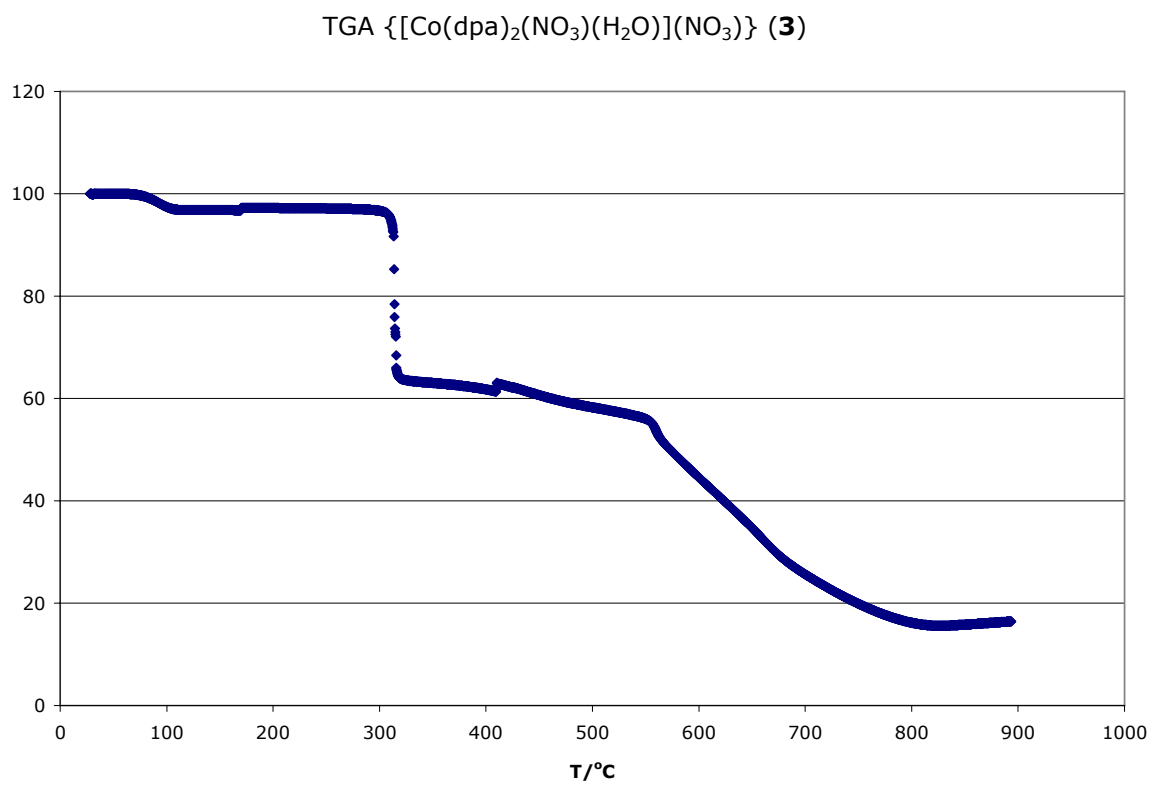

Figure S4. TGA trace for **4**.

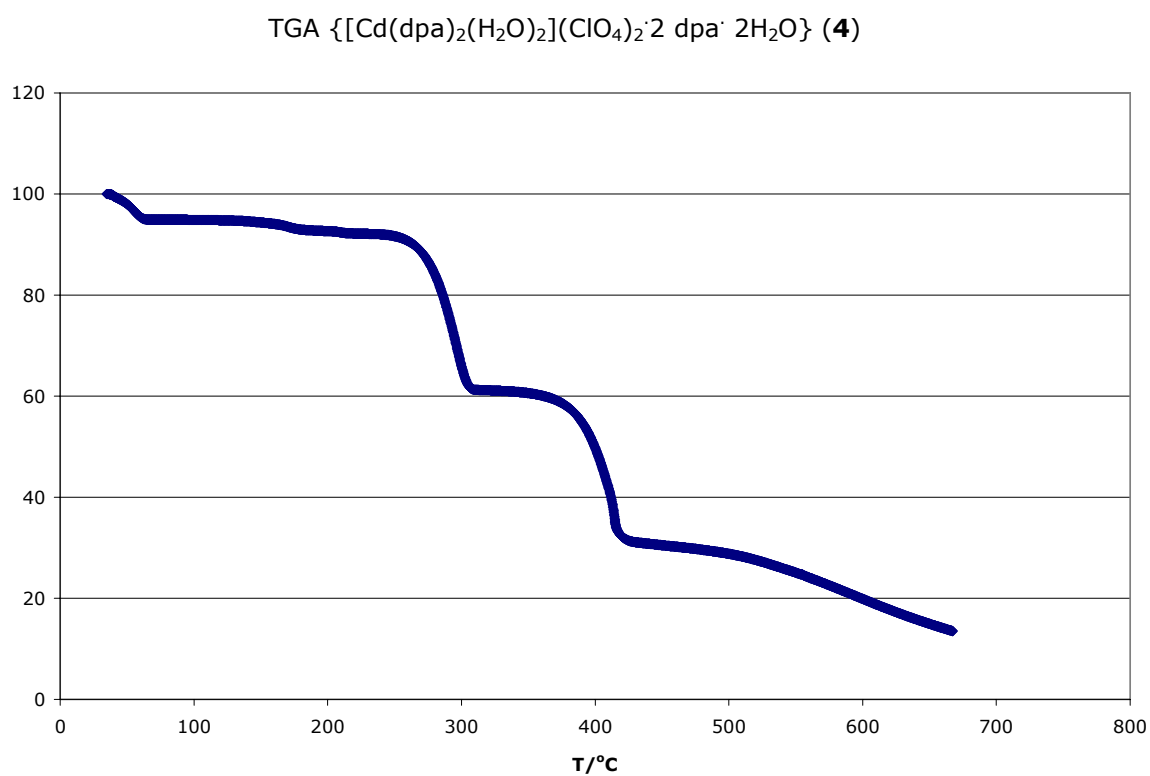

Supplement: b701102d.pdf [file b701102d.pdf]
